# Supplementary figures and images for: Dexamethasone-Induced Perturbations in Tissue Metabolomics Revealed by Chemical Isotope Labeling LC-MS Analysis
Source: MDPI journal article supplement (doi:10.3390/metabo10020042), 2020-01-21

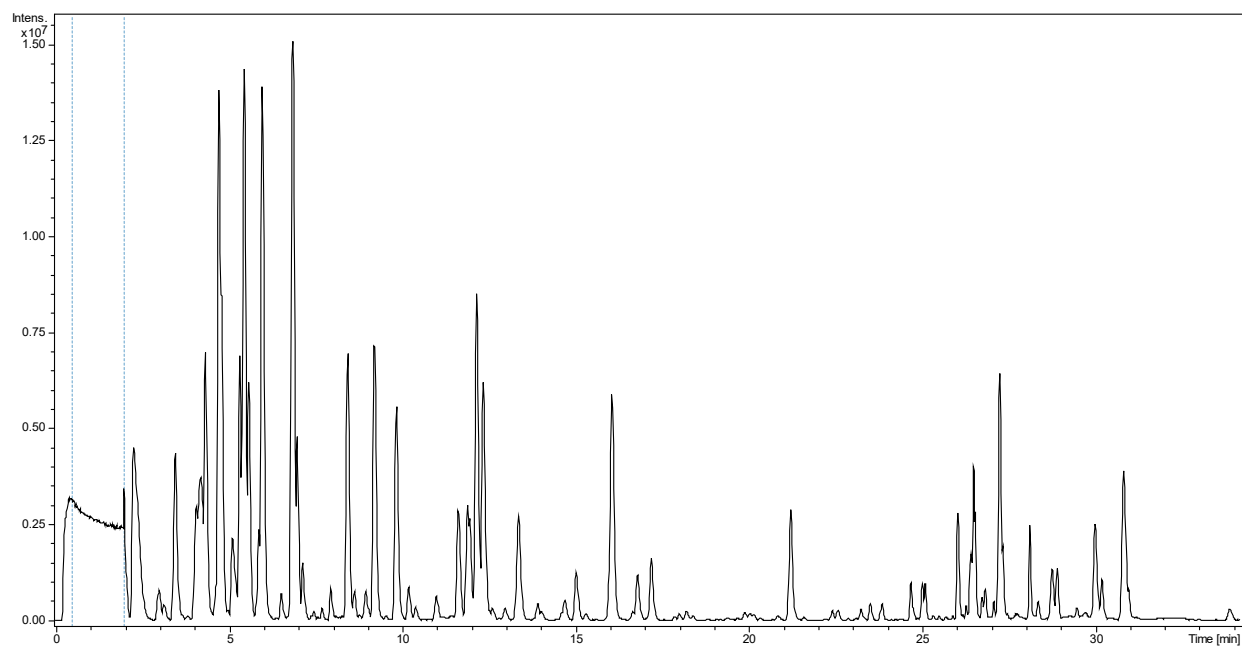

**Figure 1.** The LC chromatogram of a QC LC-MS injection.

Supplement: s1 [file s1]
